# Supplementary material
Source: publisher figshare collection journal article supplement (https://acs.figshare.com/ndownloader/files/5928120)
Supplement: Supplementary file 1 [file 5928120]

**Supporting Information for**

**High-Pressure Chemistry of a Zeolitic Imidazolate Framework  
Compound in the Presence of Different Fluids**

Junhyuck Im<sup>1</sup>, Narae Yim<sup>2</sup>, Jaheon Kim<sup>2</sup>, Thomas Vogt,<sup>3</sup> and Yongjae Lee<sup>1,4,\*</sup>

<sup>1</sup>Department of Earth System Sciences, Yonsei University, Seoul 03722, Korea.

<sup>2</sup>Department of Chemistry, Soongsil University, Seoul 06978, Korea.

<sup>3</sup>NanoCenter and Department of Chemistry & Biochemistry, University of South Carolina,  
Columbia, South Carolina 29208, United States

<sup>4</sup>Center for High Pressure Science & Technology Advanced Research (HPSTAR), Shanghai  
201203, China.

**Corresponding Author**

\*Email: [yongjaelee@yonsei.ac.kr](mailto:yongjaelee@yonsei.ac.kr), Tel.: +82-2-2123-5667.

## PART I. Experimental Details

**Synthesis of ZIF-8.** Zinc nitrate tetrahydrate ( $\text{Zn}(\text{NO}_3)_2 \cdot 6\text{H}_2\text{O}$ ; 0.146 g, 0.49 mmol) was dissolved in 10 mL methanol. Separately, 2-methylimidazole (0.325 g, 3.96 mmol) was also dissolved in 10 mL methanol. The zinc salt solution was poured quickly into the ligand solution, and the resulting mixture was slowly stirred for 2 hours at room temperature. The white precipitates were collected by centrifuging the product mixture. The collected solid was washed with neat methanol ( $3 \times 25$  mL) and dried at 50 °C in a convection oven for 24 hours.<sup>1</sup>

**Synchrotron X-ray diffraction.** *In situ* synchrotron X-ray powder diffraction experiments were performed at the beamline 10-2 at the Stanford Synchrotron Radiation Lightsource (SSRL) and the beamline 5A at the Pohang Accelerator Laboratory (PAL). At the SSRL, a focused X-ray beam with a wavelength of 0.6199(1) Å was used. The XRD patterns of ZIF-8 in the presence of different PTM (Table s1) were obtained using a Pilatus 300K-w direct photon counting detector. The detector exhibits gaps near 8.2 and 12.8 degrees as indicated in Figure 2a, 2b and 2d. At beamline 5A at the PAL, monochromatic hard X-ray photons emitted from an in-vacuum undulator source were monochromatized to a wavelength of 0.6926(1) Å and were detected using a MAR-345 imaging plate detector. The wavelength of the incident beam and the detector calibrations were carried out using  $\text{LaB}_6$  standard reference material (SRM 660b) at both synchrotron facilities.

**High-pressure experiments.** A modified Merrill-Bassett type diamond anvil cell (DAC) with two opposed diamonds supported by tungsten-carbide plates<sup>2</sup> was used for the high-pressure XRD measurements. The anvils used were brilliant-cut type-1A diamonds with a culet diameter of 700 µm. The DAC has a rectangular asymmetric slot on one side to provide an opening of ca. 40 degrees, through which diffraction data are measured. The powdered sample was loaded into a 350 µm diameter and less than 150 µm thick sample chamber obtained by electro-spark erosion in a pre-indented stainless steel foil gasket. A few ruby spheres of ~10 µm diameter were added as a pressure gauge. Subsequently, a powdered sample of as-synthesized ZIF-8 was added to the sample chamber and either water, methanol,

ethanol or silicone oil was added as a hydrostatic pressure transmitting media (PTM). The pressure at the sample in the DAC was measured by detecting the shift of R1 emission line of included ruby spheres (precision:  $\pm 0.05$  GPa).<sup>3</sup> The pressure was calculated using the equation below (1):

$$P = A / B [ 1 + (\Delta\lambda / \lambda_0) ]^B \quad (1)$$

where  $P$  is the pressure in megabars,  $\lambda$  is the wavelength of the ruby  $R$  line,  $A = 19.04$  Mbar,  $B = 7.665$ .<sup>4</sup> The sample was equilibrated for about 10 minutes in the DAC at each measured pressure. Changes in the unit cell lengths and volume were derived from a series of whole profile fitting procedure using the GSAS suite of programs.<sup>5-6</sup>

## Part II. Supporting Figure

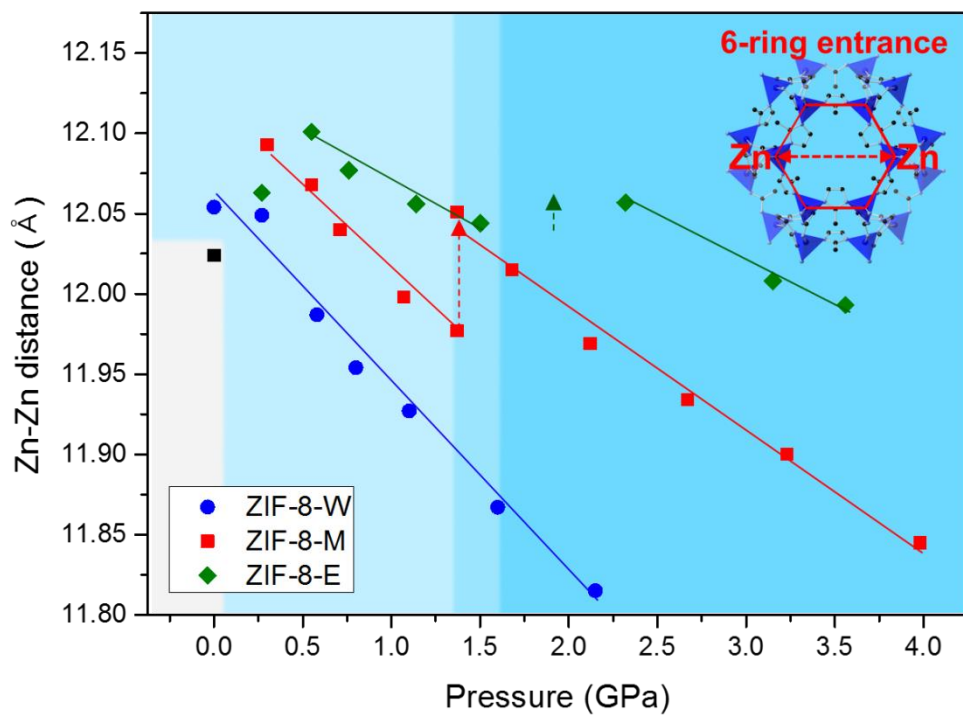

**Figure S1.** Pressure-dependent changes of Zn-Zn distance in the 6-ring entrance of the ZIF-8 framework in the presence of water (W), methanol (M), and ethanol (E) pressure transmitting medium conditions.

### Part III. Supporting Tables

**Table S1.** Summary of the pressure-dependent behavior of ZIF-8 with various pressure transmitting media (PTM).

| PTM          | $P_t$ (GPa) <sup>a</sup> | $\beta$ (GPa <sup>-1</sup> ) <sup>b</sup> | $K_0$ (GPa) <sup>c</sup> | Synchrotron Facilities |
|--------------|--------------------------|-------------------------------------------|--------------------------|------------------------|
| water        |                          | 0.03143                                   | 41.71                    | BL10-2 at SSRL         |
| methanol     | 1.4                      | 0.02703                                   | 40(2)                    | BL10-2 at SSRL         |
| ethanol      | 2.3                      | 0.01754                                   | 73(4)                    | BL5A at PAL            |
| silicone oil |                          |                                           | 20(5)                    | BL10-2 at SSRL         |

<sup>a</sup>  $P_t$ : pressure of the phase transition

<sup>b</sup>  $\beta$ : compressibility of ZIF-8-PII<sub>(1-x)</sub> phases

<sup>c</sup>  $K_0$ : bulk moduli (BM) of ZIF-8 (silicone oil PTM) and ZIF-8-PII phases ( $K_0'$ : fixed at 4)

**Table S2.** Changes of the unit cell parameters, volumes, residual electron density and inserted guest molecules as a function of pressure in ZIF-8.<sup>a</sup>

| PTM                                     | P (GPa) | treatment | phase                    | space group | a (Å)      | V (Å <sup>3</sup> ) | Residual electron density | Guest molecules |
|-----------------------------------------|---------|-----------|--------------------------|-------------|------------|---------------------|---------------------------|-----------------|
| W (H <sub>2</sub> O)                    | 0       | ambient   | ZIF-8                    | I-43m       | 17.031(2)  | 4940(2)             | 0                         | 0               |
|                                         | 0       | wet       | ZIF-8-W <sub>(1-x)</sub> | I-43m       | 17.047(1)  | 4954(1)             | 198(26)                   | 20(3)           |
|                                         | 0.27    |           | ZIF-8-W <sub>(1-x)</sub> | I-43m       | 17.039(2)  | 4948(2)             | 481(33)                   | 48(3)           |
|                                         | 0.58    |           | ZIF-8-W <sub>(1-x)</sub> | I-43m       | 16.951(1)  | 4871(1)             | 520(29)                   | 52(3)           |
|                                         | 0.8     |           | ZIF-8-W <sub>(1-x)</sub> | I-43m       | 16.905(2)  | 4832(1)             | 523(29)                   | 52(3)           |
|                                         | 1.1     |           | ZIF-8-W <sub>(1-x)</sub> | I-43m       | 16.866(1)  | 4798(1)             | 556(26)                   | 56(3)           |
|                                         | 1.6     |           | ZIF-8-W                  | I-43m       | 16.782(4)  | 4727(3)             | 619(66)                   | 62(7)           |
|                                         | 2.16    |           | ZIF-8-W                  | I-43m       | 16.709(4)  | 4665(4)             | 708(26)                   | 71(3)           |
|                                         | 0       | released  | ZIF-8                    | I-43m       | 16.927(4)  | 4850(3)             |                           |                 |
| MeOH (CH <sub>3</sub> OH)               | 0       | ambient   | ZIF-8                    | I-43m       | 17.004(2)  | 4916(2)             | 0                         | 0               |
|                                         | 0.3     |           | ZIF-8-M <sub>(1-x)</sub> | I-43m       | 17.1015(6) | 5001.6(5)           | 352(18)                   | 20(1)           |
|                                         | 0.55    |           | ZIF-8-M <sub>(1-x)</sub> | I-43m       | 17.0658(7) | 4970.3(6)           | 484(17)                   | 26.9(9)         |
|                                         | 0.71    |           | ZIF-8-M <sub>(1-x)</sub> | I-43m       | 17.0269(8) | 4936.4(7)           | 521(19)                   | 29(1)           |
|                                         | 1.07    |           | ZIF-8-M <sub>(1-x)</sub> | I-43m       | 16.9680(9) | 4885.3(7)           | 584(16)                   | 32.5(9)         |
|                                         | 1.37    |           | ZIF-8-M <sub>(1-x)</sub> | I-43m       | 16.954(1)  | 4873.4(9)           | 635(27)                   | 35(2)           |
|                                         |         |           | ZIF-8-M                  | I-43m       | 17.059(1)  | 4964.0(9)           |                           |                 |
|                                         | 1.68    |           | ZIF-8-M <sub>(1-x)</sub> | I-43m       | 16.912(1)  | 4837(1)             |                           |                 |
|                                         |         |           | ZIF-8-M                  | I-43m       | 16.9801(6) | 4895.7(6)           | 654(22)                   | 36(1)           |
|                                         | 2.12    |           | ZIF-8-M                  | I-43m       | 16.9273(5) | 4850.2(5)           | 648(19)                   | 36(1)           |
|                                         | 2.67    |           | ZIF-8-M                  | I-43m       | 16.8779(6) | 4807.9(5)           | 674(23)                   | 37(1)           |
|                                         | 3.23    |           | ZIF-8-M                  | I-43m       | 16.8292(5) | 4766.4(4)           | 669(16)                   | 37.2(9)         |
|                                         | 3.98    |           | ZIF-8-M                  | I-43m       | 16.7506(5) | 4699.9(4)           | 686(18)                   | 38(1)           |
|                                         | 0       | released  | ZIF-8                    | I-43m       | 16.954(2)  | 4873(2)             |                           |                 |
| EtOH (C <sub>2</sub> H <sub>5</sub> OH) | 0       | ambient   | ZIF-8                    | I-43m       | 17.014(1)  | 4925(1)             | 0                         | 0               |
|                                         | 0.3     |           | ZIF-8-E <sub>(1-x)</sub> | I-43m       | 17.0592(6) | 4964.5(6)           | 288(27)                   | 11(1)           |
|                                         | 0.6     |           | ZIF-8-E <sub>(1-x)</sub> | I-43m       | 17.111(1)  | 5010(1)             | 460(33)                   | 18(1)           |
|                                         | 0.8     |           | ZIF-8-E <sub>(1-x)</sub> | I-43m       | 17.078(1)  | 4980.5(9)           | 478(26)                   | 18(1)           |
|                                         | 1.1     |           | ZIF-8-E <sub>(1-x)</sub> | I-43m       | 17.047(1)  | 4954.0(9)           | 482(30)                   | 19(1)           |
|                                         | 1.5     |           | ZIF-8-E <sub>(1-x)</sub> | I-43m       | 17.031(1)  | 4939.7(9)           | 520(21)                   | 20(1)           |
|                                         | 2.3     |           | ZIF-8-E                  | I-43m       | 17.050(2)  | 4957(1)             | 573(21)                   | 22(1)           |
|                                         | 3.2     |           | ZIF-8-E                  | I-43m       | 16.981(2)  | 4896(2)             | 662(26)                   | 25(1)           |
|                                         | 3.6     |           | ZIF-8-E                  | I-43m       | 16.9619(8) | 4880.0(7)           | 661(42)                   | 25(2)           |
|                                         | 0       | released  | ZIF-8                    | I-43m       | 16.9707(4) | 4887.6(4)           |                           |                 |

|                 |     |         |         |               |           |         |
|-----------------|-----|---------|---------|---------------|-----------|---------|
| Silicone<br>Oil | 0   | ambient | ZIF-8   | I-43 <i>m</i> | 17.031(2) | 4940(2) |
|                 | 0.3 |         | ZIF-8-O | I-43 <i>m</i> | 17.013(1) | 4925(1) |
|                 | 0.5 |         | ZIF-8-O | I-43 <i>m</i> | 16.892(4) | 4820(4) |

<sup>a</sup> ESD's are in parentheses.

#### Part IV. References

- (1) Cravillon, J.; Münzer, S.; Lohmeier, S.-J.; Feldhoff, A.; Huber, K.; Wiebcke, M. *Chem. Mater.* **2009**, *21*, 1400.
- (2) Mao, H. O. K.; Hemley, R. J. *Philos. Trans. A Math. Phys. Eng. Sci.* **1996**, *354*, 1315.
- (3) Bell, P. M.; Mao, H. K. *Absolute pressure measurements and their comparison with the ruby fluorescence (R1) pressure scale to 1.5 Mbar*; Carnegie Institution: Carnegie Institution of Washington Year Book, 1979; pp 665-669.
- (4) Mao, H. K.; Xu, J.; Bell, P. M. *J. Geophys. Res.-Solid* **1986**, *91*, 4673.
- (5) Larson, A. C.; Dreele, R. B. V. *GSAS-General Structure Analysis System*; Los Alamos National Laboratory: 1986.
- (6) Toby, B. H. *J. Appl. Crystallogr.* **2001**, *34*, 210.
